# Supplementary material for: Chiral lanthanide–silver(i) cluster-based metal–organic frameworks exhibiting solvent stability, and tunable photoluminescence
Source: Royal Society of Chemistry journal article supplement (doi:10.1039/d3nr03302c), 2023-01-01
Supplement: d3nr03302c1.pdf [file d3nr03302c1.pdf]

## Electronic Supplementary Information

# Chiral Lanthanide-Silver(I) Cluster-based Metal-Organic Frameworks Exhibiting Solvent Stability, and Tunable Photoluminescence

Sheng-Rong He,<sup>†1</sup> Han Xu,<sup>†3</sup> Cheng Chen,<sup>†1</sup> Xue-Tao Wang,<sup>1</sup> Tian-Qi Lu,<sup>1</sup> Lingyun Cao,<sup>\*2</sup> Jun Zheng<sup>1</sup> and Xiu-Ying Zheng<sup>\*1</sup>

<sup>1</sup> Institutes of Physical Science and Information Technology, Key Laboratory of Structure and Functional Regulation of Hybrid Materials of Ministry of Education, Anhui University, Hefei, 230601, P. R. China.

<sup>2</sup> Innovation Laboratory for Sciences and Technologies of Energy Materials of Fujian Province (IKKEM), Xiamen, 361005, P. R. China.

<sup>3</sup> School of Pharmaceutical Science & Yunnan Key Laboratory of Pharmacology for Natural Products, Kunming Medical University, Kunming, 650500 P. R. China.

Email: caoly@xmu.edu.cn; xyzheng@ahu.edu.cn

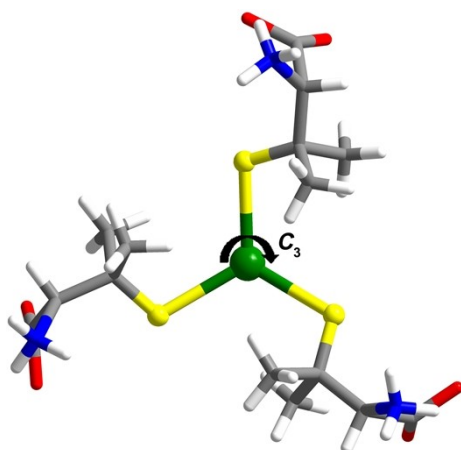

**Fig. S1** Ag(I)-centered triangular complex  $\{\text{Ag}(\text{L-HL})_3\}$  featuring  $C_3$  symmetry in **1-L**.

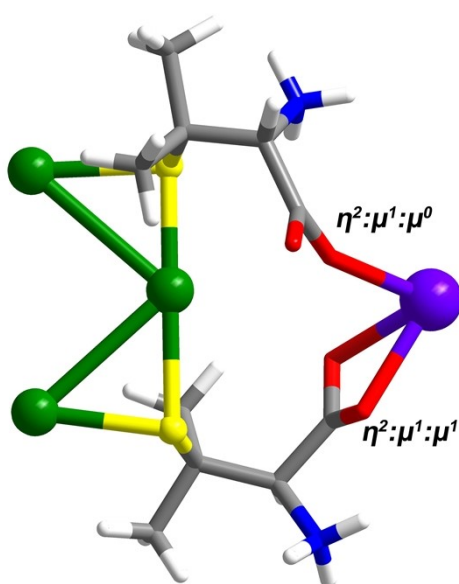

**Fig. S2** Two kinds of coordination modes between  $\text{Gd}^{3+}$  and  $\text{L-HL}^-$  ligand in **1-L**.

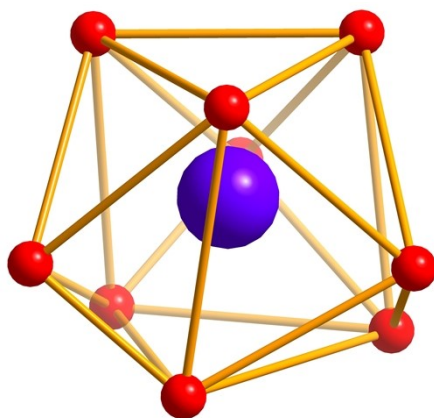

**Fig. S3** Two kinds of coordination modes between  $\text{Gd}^{3+}$  and  $\text{L-HL}^-$  ligand in **1-L**.

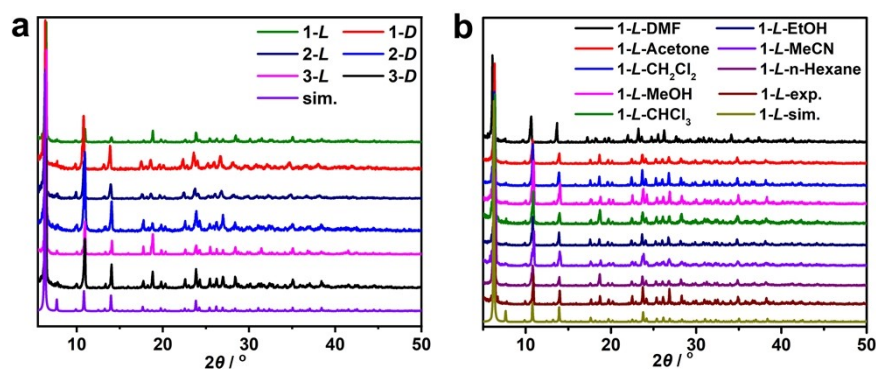

**Fig. S4** (a) The experimental and simulated PXRD spectra of *L*-LnAg<sub>5</sub>-3D and *D*-LnAg<sub>5</sub>-3D; (b) the PXRD of compound 1-*L* before and after immersion in different polar organic solvents.

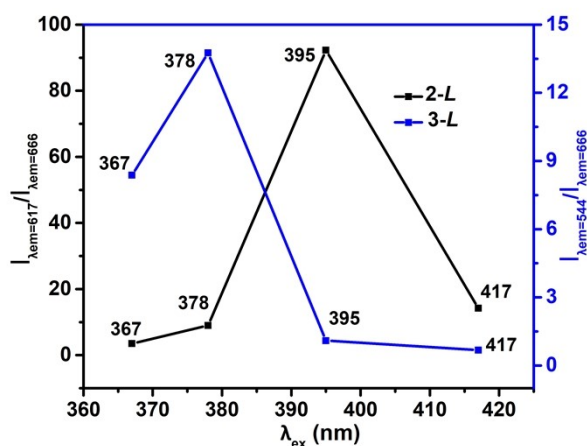

**Fig. S5** The ratio of the emission intensity of Ln<sup>3+</sup> ( $\lambda_{em} = 617$  nm for Eu<sup>3+</sup>,  $\lambda_{em} = 544$  nm for Tb<sup>3+</sup>) to that of {Ag<sub>5</sub>S<sub>6</sub>} moiety ( $\lambda_{em} = 666$  nm) varied with the excitation wavelengths in compounds 2-*L* and 3-*L*.

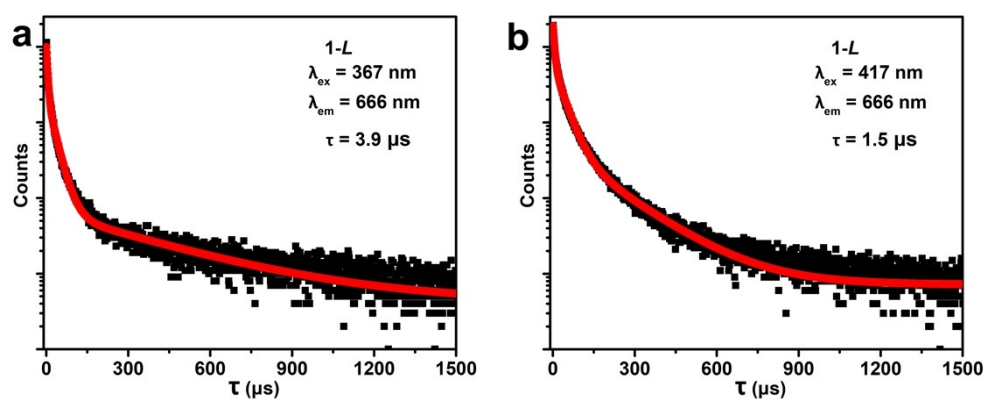

**Fig. S6** (a, b) The decay curves of compound 1-*L* at  $\lambda_{ex} = 367/417$  nm,  $\lambda_{em} = 666$  nm.

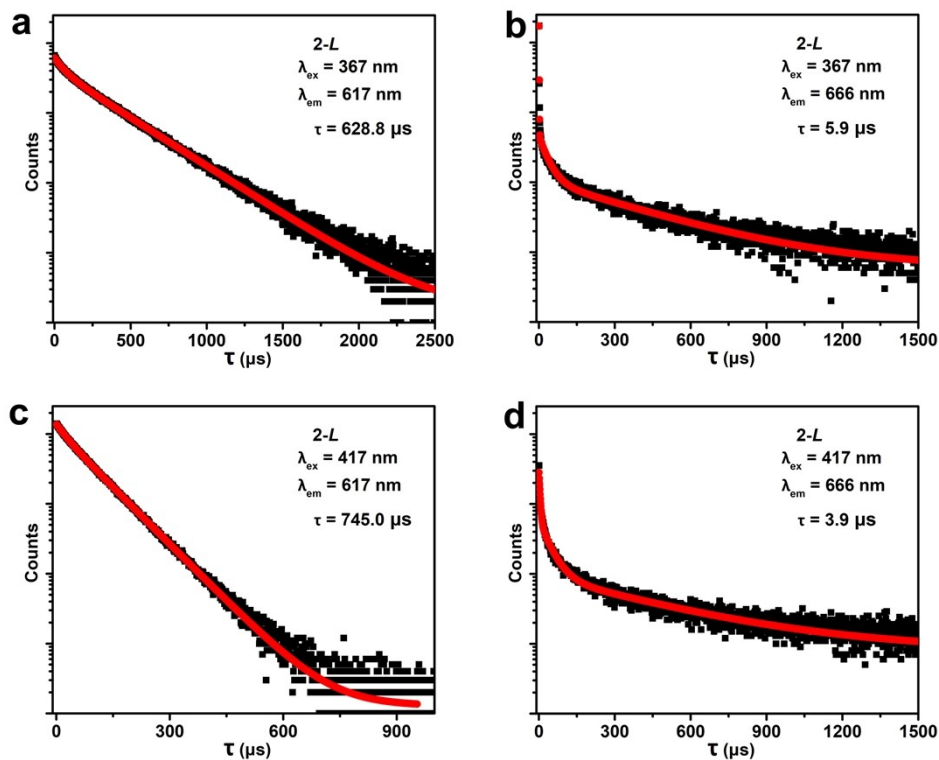

**Fig. S7** The decay curves of compound **2-L** at  $\lambda_{\text{ex}} = 367 \text{ nm}$ ,  $\lambda_{\text{em}} = 617/666 \text{ nm}$  (a, b) and  $\lambda_{\text{ex}} = 417 \text{ nm}$ ,  $\lambda_{\text{em}} = 617/666 \text{ nm}$  (c, d).

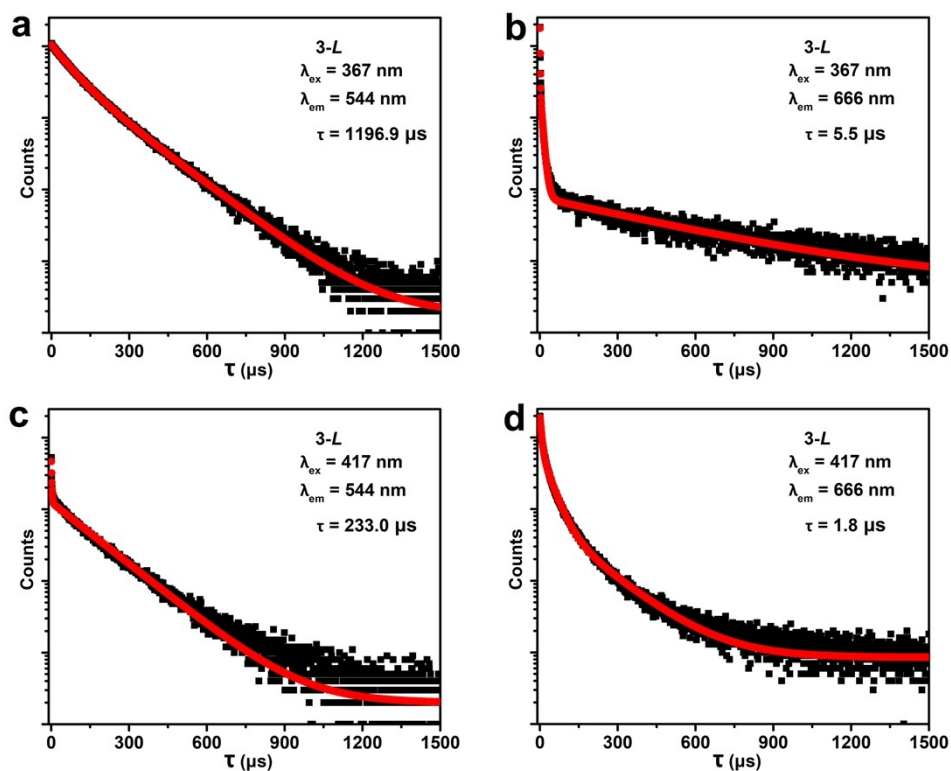

**Fig. S8** The decay curves of compound **3-L** at  $\lambda_{\text{ex}} = 367 \text{ nm}$ ,  $\lambda_{\text{em}} = 544/666 \text{ nm}$  (a, b) and  $\lambda_{\text{ex}} = 417 \text{ nm}$ ,  $\lambda_{\text{em}} = 544/666 \text{ nm}$  (c, d).

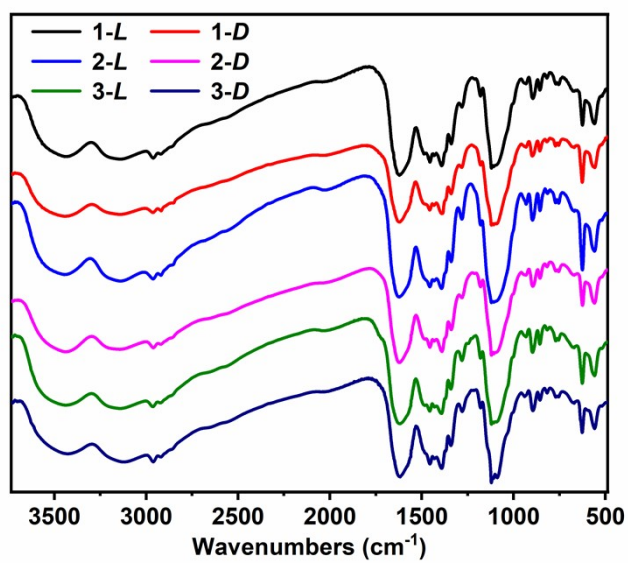

**Fig. S9** IR spectra for compounds *L*-LnAg5-3D and *D*-LnAg5-3D.

**Table S1.** The lifetimes of compounds **1-L**, **2-L** and **3-L** at different excitation and emission wavelengths.

| Compound   | $\lambda_{\text{ex}}$ / nm | $\lambda_{\text{em}}$ / nm | Lifetime / $\mu\text{s}$ |
|------------|----------------------------|----------------------------|--------------------------|
| <b>1-L</b> | 367                        | 666                        | 3.9                      |
| <b>1-L</b> | 417                        | 666                        | 1.5                      |
| <b>2-L</b> | 367                        | 617                        | 745.0                    |
| <b>2-L</b> | 367                        | 666                        | 5.9                      |
| <b>2-L</b> | 417                        | 617                        | 628.8                    |
| <b>2-L</b> | 417                        | 666                        | 3.9                      |
| <b>3-L</b> | 367                        | 544                        | 1196.9                   |
| <b>3-L</b> | 367                        | 666                        | 5.8                      |
| <b>3-L</b> | 417                        | 544                        | 223.0                    |
| <b>3-L</b> | 417                        | 666                        | 1.8                      |

**Table S2.** Crystallographic data for compounds **1-L** and **1-D**.

| Compound                                         | <b>1-L</b>                           | <b>1-D</b>                           |
|--------------------------------------------------|--------------------------------------|--------------------------------------|
| Formula                                          | $C_{30}H_{90}Ag_5Cl_2GdN_6O_{35}S_6$ | $C_{30}H_{84}Ag_5Cl_2GdN_6O_{32}S_6$ |
| FW                                               | 2054.93                              | 2000.89                              |
| T/K                                              | 120                                  | 120                                  |
| Cry. system                                      | cubic                                | cubic                                |
| Space group                                      | $P2_13$                              | $P2_13$                              |
| a /Å                                             | 20.2194(5)                           | 20.354(5)                            |
| b /Å                                             | 20.2194(5)                           | 20.354(5)                            |
| c /Å                                             | 20.2194(5)                           | 20.354(5)                            |
| $\alpha$ /°                                      | 90                                   | 90                                   |
| $\beta$ /°                                       | 90                                   | 90                                   |
| $\gamma$ /°                                      | 90                                   | 90                                   |
| V/Å <sup>3</sup>                                 | 8266.2(6)                            | 8432(6)                              |
| Z                                                | 4                                    | 4                                    |
| Dc/g cm <sup>-3</sup>                            | 1.651                                | 1.576                                |
| $\mu$ / mm <sup>-1</sup>                         | 17.069                               | 16.689                               |
| Data/parameters                                  | 4951/191                             | 4855/188                             |
| 2 $\theta$ /°                                    | 8.746-139.38                         | 7.522-135.706                        |
| Obs. reflections                                 | 4951                                 | 4855                                 |
| F(000)                                           | 4084.0                               | 3964.0                               |
| GOF                                              | 1.029                                | 0.937                                |
| R <sub>1</sub> [I > 2 $\sigma$ (I)] <sup>a</sup> | 0.0706                               | 0.0845                               |
| wR <sub>2</sub> (All data) <sup>b</sup>          | 0.2102                               | 0.2171                               |

<sup>a</sup> $R_1 = \sum ||F_o| - |F_c|| / \sum |F_o|$ ; <sup>b</sup> $wR_2 = \{ \sum [w(F_o^2 - F_c^2)^2] / \sum [w(F_o^2)^2] \}^{1/2}$

**Table S3.** Crystallographic data for compounds **2-L** and **2-D**.

| Compound                                | <b>2-L</b>                                                                                                      | <b>2-D</b>                                                                                                       |
|-----------------------------------------|-----------------------------------------------------------------------------------------------------------------|------------------------------------------------------------------------------------------------------------------|
| Formula                                 | C <sub>30</sub> H <sub>90</sub> Ag <sub>5</sub> Cl <sub>2</sub> EuN <sub>6</sub> O <sub>35</sub> S <sub>6</sub> | C <sub>30</sub> H <sub>108</sub> Ag <sub>5</sub> Cl <sub>2</sub> EuN <sub>6</sub> O <sub>44</sub> S <sub>6</sub> |
| FW                                      | 2049.64                                                                                                         | 2211.79                                                                                                          |
| T/K                                     | 120                                                                                                             | 120                                                                                                              |
| Cry. system                             | cubic                                                                                                           | cubic                                                                                                            |
| Space group                             | <i>P2<sub>1</sub>3</i>                                                                                          | <i>P2<sub>1</sub>3</i>                                                                                           |
| a /Å                                    | 20.2017(6)                                                                                                      | 20.2305(7)                                                                                                       |
| b /Å                                    | 20.2017(6)                                                                                                      | 20.2305(7)                                                                                                       |
| c /Å                                    | 20.2017(6)                                                                                                      | 20.2305(7)                                                                                                       |
| α/°                                     | 90                                                                                                              | 90                                                                                                               |
| β/°                                     | 90                                                                                                              | 90                                                                                                               |
| γ/°                                     | 90                                                                                                              | 90                                                                                                               |
| V/Å <sup>3</sup>                        | 8244.5(7)                                                                                                       | 8279.8(9)                                                                                                        |
| Z                                       | 4                                                                                                               | 4                                                                                                                |
| Dc/g cm <sup>-3</sup>                   | 1.651                                                                                                           | 1.774                                                                                                            |
| μ/ mm <sup>-1</sup>                     | 17.356                                                                                                          | 17.415                                                                                                           |
| Data/parameters                         | 4494/191                                                                                                        | 4451/191                                                                                                         |
| 2θ/°                                    | 9.79-132.89                                                                                                     | 7.568-129.862                                                                                                    |
| Obs. reflections                        | 4494                                                                                                            | 4451                                                                                                             |
| F(000)                                  | 4080.0                                                                                                          | 4440.0                                                                                                           |
| GOF                                     | 1.039                                                                                                           | 1.021                                                                                                            |
| R <sub>1</sub> [I > 2σ(I)] <sup>a</sup> | 0.0786                                                                                                          | 0.0759                                                                                                           |
| wR <sub>2</sub> (All data) <sup>b</sup> | 0.2241                                                                                                          | 0.2266                                                                                                           |

<sup>a</sup>R<sub>1</sub>=Σ||F<sub>o</sub>| - |F<sub>c</sub>||/Σ|F<sub>o</sub>|; <sup>b</sup>wR<sub>2</sub>={Σ[w(F<sub>o</sub><sup>2</sup> - F<sub>c</sub><sup>2</sup>)<sup>2</sup>]/Σ[w(F<sub>o</sub><sup>2</sup>)<sup>2</sup>]}<sup>1/2</sup>



**Table S4.** Crystallographic data for compounds **3-L** and **3-D**.

| Compound                                | <b>3-L</b>                                                                                                      | <b>3-D</b>                                                                                                      |
|-----------------------------------------|-----------------------------------------------------------------------------------------------------------------|-----------------------------------------------------------------------------------------------------------------|
| Formula                                 | C <sub>30</sub> H <sub>82</sub> Ag <sub>5</sub> Cl <sub>2</sub> TbN <sub>6</sub> O <sub>31</sub> S <sub>6</sub> | C <sub>30</sub> H <sub>84</sub> Ag <sub>5</sub> Cl <sub>2</sub> TbN <sub>6</sub> O <sub>32</sub> S <sub>6</sub> |
| FW                                      | 1984.54                                                                                                         | 2002.56                                                                                                         |
| T/K                                     | 150                                                                                                             | 150                                                                                                             |
| Cry. system                             | cubic                                                                                                           | cubic                                                                                                           |
| Space group                             | <i>P</i> 2 <sub>1</sub> 3                                                                                       | <i>P</i> 2 <sub>1</sub> 3                                                                                       |
| a /Å                                    | 20.241(2)                                                                                                       | 20.285(3)                                                                                                       |
| b /Å                                    | 20.241(2)                                                                                                       | 20.285(3)                                                                                                       |
| c /Å                                    | 20.241(2)                                                                                                       | 20.285(3)                                                                                                       |
| α/°                                     | 90                                                                                                              | 90                                                                                                              |
| β/°                                     | 90                                                                                                              | 90                                                                                                              |
| γ/°                                     | 90                                                                                                              | 90                                                                                                              |
| V/Å <sup>3</sup>                        | 8293(3)                                                                                                         | 8343(4)                                                                                                         |
| Z                                       | 4                                                                                                               | 4                                                                                                               |
| Dc/g cm <sup>-3</sup>                   | 1.590                                                                                                           | 1.594                                                                                                           |
| μ/ mm <sup>-1</sup>                     | 15.976                                                                                                          | 15.888                                                                                                          |
| Data/parameters                         | 4916/192                                                                                                        | 4673/192                                                                                                        |
| 2θ/°                                    | 7.566-139.05                                                                                                    | 8.718-133.858                                                                                                   |
| Obs. reflections                        | 4916                                                                                                            | 4673                                                                                                            |
| F(000)                                  | 3928.0                                                                                                          | 3968.0                                                                                                          |
| GOF                                     | 1.041                                                                                                           | 1.122                                                                                                           |
| R <sub>1</sub> [I > 2σ(I)] <sup>a</sup> | 0.0886                                                                                                          | 0.1209                                                                                                          |
| wR <sub>2</sub> (All data) <sup>b</sup> | 0.2497                                                                                                          | 0.3019                                                                                                          |

<sup>a</sup>R<sub>1</sub>=Σ||F<sub>o</sub>| - |F<sub>c</sub>||/Σ|F<sub>o</sub>|; <sup>b</sup>wR<sub>2</sub>={Σ[w(F<sub>o</sub><sup>2</sup> - F<sub>c</sub><sup>2</sup>)<sup>2</sup>]/Σ[w(F<sub>o</sub><sup>2</sup>)<sup>2</sup>]}<sup>1/2</sup>

**Table S5.** Selected bond distances (Å) and bond angles (°) of **1-L**.

|                                      |            |                                      |            |
|--------------------------------------|------------|--------------------------------------|------------|
| Ag1-S1 <sup>1</sup>                  | 2.480(11)  | Gd1-O1 <sup>4</sup>                  | 2.463(17)  |
| Ag1-S1                               | 2.480(11)  | Gd1-O3 <sup>3</sup>                  | 2.446(17)  |
| Ag1-S1 <sup>2</sup>                  | 2.480(11)  | Gd1-O3                               | 2.446(17)  |
| Ag2-S2 <sup>1</sup>                  | 2.456(11)  | Gd1-O3 <sup>4</sup>                  | 2.446(17)  |
| Ag2-S2                               | 2.456(11)  | Gd1-O4                               | 2.471(19)  |
| Ag2-S2 <sup>2</sup>                  | 2.456(11)  | Gd1-O4 <sup>4</sup>                  | 2.471(19)  |
| Ag3-S1                               | 2.373(15)  | Gd1-O4 <sup>3</sup>                  | 2.471(19)  |
| Ag3-S2                               | 2.385(15)  | Gd2-O1 <sup>4</sup>                  | 1.75(2)    |
| Gd1-O1                               | 2.463(17)  | Gd2-O1 <sup>3</sup>                  | 1.75(2)    |
| Gd1-O1 <sup>3</sup>                  | 2.463(17)  | Gd2-O1                               | 1.75(2)    |
| <hr/>                                |            |                                      |            |
| S1 <sup>2</sup> -Ag1-S1              | 119.81(6)  | O3-Gd1-O1 <sup>3</sup>               | 143.9(7)   |
| S1 <sup>1</sup> -Ag1-S1              | 119.81(6)  | O3 <sup>3</sup> -Gd1-O1              | 74.7(6)    |
| S1 <sup>2</sup> -Ag1-S1              | 119.81(6)  | O3 <sup>4</sup> -Gd1-O1 <sup>4</sup> | 77.7(7)    |
| S2-Ag2-S2 <sup>2</sup>               | 119.03(12) | O3 <sup>4</sup> -Gd1-O4 <sup>4</sup> | 50.7(6)    |
| S2-Ag2-S2 <sup>1</sup>               | 119.03(12) | O3 <sup>4</sup> -Gd1-O3 <sup>3</sup> | 117.6(2)   |
| S1-Ag3-S2                            | 179.3(3)   | O3 <sup>4</sup> -Gd1-O4 <sup>3</sup> | 72.1(7)    |
| O1 <sup>4</sup> -Gd1-O1              | 75.5(8)    | O3-Gd1-O4 <sup>3</sup>               | 130.4(8)   |
| O1 <sup>4</sup> -Gd1-O4              | 124.8(7)   | O4 <sup>4</sup> -Gd1-O4              | 84.9(10)   |
| O1 <sup>3</sup> -Gd1-O4 <sup>3</sup> | 85.29(8)   | O1 <sup>3</sup> -Gd2-O1              | 119.57(14) |
| O1 <sup>3</sup> -Gd1-O4              | 147.5(8)   | O1 <sup>4</sup> -Gd2-O1              | 119.57(14) |
| O1 <sup>4</sup> -Gd1-O4 <sup>4</sup> | 85.2(8)    |                                      |            |

Symmetry code: <sup>1</sup>-1/2+Y,-1/2-Z,-1-X; <sup>2</sup>-1-Z,1/2+X,-1/2-Y; <sup>3</sup>-1-Y,1/2+Z,-3/2-X; <sup>4</sup>-3/2-Z,-1-X,-1/2+Y

**Table S6.** Selected bond distances (Å) and band angles (°) of **1-D**.

|                                      |           |                                      |           |
|--------------------------------------|-----------|--------------------------------------|-----------|
| Gd1-O1                               | 2.342(13) | Ag1-S2 <sup>4</sup>                  | 2.488(6)  |
| Gd1-O1 <sup>1</sup>                  | 2.342(13) | Ag1-S2                               | 2.489(6)  |
| Gd1-O1 <sup>2</sup>                  | 2.342(12) | Ag1-S2 <sup>3</sup>                  | 2.488(6)  |
| Gd1-O3 <sup>2</sup>                  | 2.490(15) | Ag2-S1 <sup>3</sup>                  | 2.479(6)  |
| Gd1-O3 <sup>1</sup>                  | 2.490(15) | Ag2-S1                               | 2.479(6)  |
| Gd1-O3                               | 2.490(15) | Ag2-S1 <sup>4</sup>                  | 2.479(6)  |
| Gd1-O4                               | 2.512(17) | Ag3-S1                               | 2.366(7)  |
| Gd1-O4 <sup>1</sup>                  | 2.512(17) | Ag3-S2                               | 2.368(7)  |
| Gd1-O4 <sup>2</sup>                  | 2.512(18) |                                      |           |
| O1-Gd1-O1 <sup>1</sup>               | 78.1(6)   | O3-Gd1-O4 <sup>2</sup>               | 126.8(6)  |
| O1-Gd1-O3 <sup>2</sup>               | 145.8(5)  | O3 <sup>2</sup> -Gd1-O4 <sup>2</sup> | 53.0(4)   |
| O1-Gd1-O3 <sup>2</sup>               | 73.3(5)   | O3-Gd1-O4 <sup>1</sup>               | 71.0(6)   |
| O1 <sup>1</sup> -Gd1-O4 <sup>2</sup> | 148.5(5)  | O4 <sup>2</sup> -Gd1-O4 <sup>1</sup> | 79.2(6)   |
| O1-Gd1-O4                            | 87.2(6)   | S2 <sup>3</sup> -Ag1-S2              | 119.04(6) |
| O1 <sup>2</sup> -Gd1-O4 <sup>1</sup> | 126.2(5)  | S1 <sup>3</sup> -Ag2-S1 <sup>4</sup> | 119.77(3) |
| O3 <sup>2</sup> -Gd1-O3 <sup>1</sup> | 117.4(2)  | S1-Ag3-S2                            | 179.6(3)  |
| O3-Gd1-O3 <sup>2</sup>               | 117.6(2)  |                                      |           |

Symmetry code: <sup>1</sup>-1/2+Y,3/2-Z,1-X; <sup>2</sup>1-Z,1/2+X,3/2-Y; <sup>3</sup>-1/2+Z,1/2-X,1-Y; <sup>4</sup>1/2-Y,1-Z,1/2+X

**Table S7.** Selected bond distances (Å) and bond angles (°) of **2-L**.

|                                      |            |                                      |           |
|--------------------------------------|------------|--------------------------------------|-----------|
| Eu1-O4 <sup>3</sup>                  | 3.16(2)    | Eu2-O1 <sup>4</sup>                  | 2.42(2)   |
| Eu1-O4 <sup>4</sup>                  | 3.16(2)    | Eu2-O1                               | 2.42(2)   |
| Eu1-O4                               | 3.16(2)    | Ag1-S1                               | 2.530(12) |
| Eu1-O3                               | 3.05(2)    | Ag1-S1 <sup>1</sup>                  | 2.530(12) |
| Eu1-O3 <sup>4</sup>                  | 3.05(2)    | Ag1-S1 <sup>2</sup>                  | 2.530(12) |
| Eu1-O3 <sup>3</sup>                  | 3.05(2)    | Ag2-S2 <sup>1</sup>                  | 2.423(10) |
| Eu2-O2 <sup>3</sup>                  | 2.51(2)    | Ag2-S2 <sup>2</sup>                  | 2.423(10) |
| Eu2-O2 <sup>4</sup>                  | 2.51(2)    | Ag2-S2                               | 2.423(10) |
| Eu2-O2                               | 2.51(2)    | Ag3-S1                               | 2.350(14) |
| Eu2-O1 <sup>3</sup>                  | 2.42(2)    | Ag3-S2                               | 2.431(15) |
| <hr/>                                |            |                                      |           |
| S1-Ag1-S1 <sup>1</sup>               | 119.80(5)  | O3 <sup>3</sup> -Eu1-O3              | 82.7(7)   |
| S2 <sup>1</sup> -Ag2-S2 <sup>2</sup> | 118.96(12) | O2 <sup>4</sup> -Eu2-O2 <sup>3</sup> | 79.0(8)   |
| S1-Ag3-S2                            | 178.2(4)   | O1 <sup>4</sup> -Eu2-O2 <sup>4</sup> | 88.9(7)   |
| O4 <sup>3</sup> -Eu1-O4              | 84.2(6)    | O1-Eu2-O2 <sup>4</sup>               | 151.0(7)  |
| O3 <sup>3</sup> -Eu1-O4 <sup>3</sup> | 167.5(5)   | O1 <sup>4</sup> -Eu2-O2              | 124.7(7)  |
| O3-Eu1-O4                            | 89.0(6)    | O1-Eu2-O1 <sup>4</sup>               | 76.4(8)   |
| O3-Eu1-O4 <sup>3</sup>               | 105.6(5)   |                                      |           |

Symmetry code: <sup>1</sup>-1/2+Y,3/2-Z,1-X; <sup>2</sup>1-Z,1/2+X,3/2-Y; <sup>3</sup>+Z,+X,+Y; <sup>4</sup>+Y,+Z,+X

**Table S8.** Selected bond distances (Å) and bond angles (°) of **2-D**.

|                                      |           |                                      |            |
|--------------------------------------|-----------|--------------------------------------|------------|
| Eu1-O1 <sup>1</sup>                  | 2.55(2)   | Ag3-S1                               | 2.369(7)   |
| Eu1-O1 <sup>2</sup>                  | 2.55(2)   | Ag3-S2                               | 2.362(8)   |
| Eu1-O1                               | 2.55(2)   | Ag1-S1                               | 2.446(6)   |
| Eu1-O2 <sup>2</sup>                  | 2.502(18) | Ag1-S1 <sup>4</sup>                  | 2.446(6)   |
| Eu1-O2 <sup>1</sup>                  | 2.502(18) | Ag1-S1 <sup>3</sup>                  | 2.446(6)   |
| Eu1-O2                               | 2.502(18) | Ag2-S2                               | 2.485(7)   |
| Eu1-O4                               | 2.367(14) | Ag2-S2 <sup>4</sup>                  | 2.485(7)   |
| Eu1-O4 <sup>1</sup>                  | 2.367(14) | Ag2-S2 <sup>3</sup>                  | 2.485(7)   |
| Eu1-O4 <sup>2</sup>                  | 2.367(14) |                                      |            |
| O1-Eu1-O1 <sup>1</sup>               | 78.8(7)   | O4 <sup>2</sup> -Eu1-O2 <sup>1</sup> | 145.8(6)   |
| O2-Eu1-O1 <sup>1</sup>               | 126.1(6)  | O4 <sup>1</sup> -Eu1-O2 <sup>1</sup> | 78.5(6)    |
| O2 <sup>2</sup> -Eu1-O1 <sup>2</sup> | 51.7(4)   | O4-Eu1-O2 <sup>1</sup>               | 73.0(6)    |
| O2 <sup>1</sup> -Eu1-O1              | 72.5(6)   | O4 <sup>1</sup> -Eu1-O4              | 78.0(6)    |
| O2 <sup>2</sup> -Eu1-O2              | 117.4(2)  | S1-Ag1-S1 <sup>3</sup>               | 119.84 (3) |
| O4 <sup>2</sup> -Eu1-O1              | 124.6(6)  | S2-Ag2-S2 <sup>3</sup>               | 118.98(7)  |
| O4-Eu1-O1                            | 87.9(6)   | S2-Ag3-S1                            | 179.3(2)   |
| O4 <sup>2</sup> -Eu1-O1 <sup>1</sup> | 150.4(6)  |                                      |            |

Symmetry code: <sup>1</sup>+Z,+X,+Y; <sup>2</sup>+Y,+Z,+X; <sup>3</sup>1/2-Y,1-Z,1/2+X; <sup>4</sup>-1/2+Z,1/2-X,1-Y

**Table S9.** Selected bond distances (Å) and bond angles (°) of **3-L**.

|                                      |            |                                      |           |
|--------------------------------------|------------|--------------------------------------|-----------|
| Ag1-S1 <sup>1</sup>                  | 2.502(9)   | Tb1-O2 <sup>4</sup>                  | 2.45(2)   |
| Ag1-S1                               | 2.502(9)   | Tb1-O3 <sup>4</sup>                  | 2.35(2)   |
| Ag1-S1 <sup>2</sup>                  | 2.502(9)   | Tb1-O3 <sup>3</sup>                  | 2.35(2)   |
| Ag2-S2                               | 2.449(9)   | Tb1-O3                               | 2.35(2)   |
| Ag2-S2 <sup>1</sup>                  | 2.449(9)   | Tb2-O1 <sup>3</sup>                  | 2.38(3)   |
| Ag2-S2 <sup>2</sup>                  | 2.449(9)   | Tb2-O1 <sup>4</sup>                  | 2.38(3)   |
| Ag3-S1                               | 2.407(14)  | Tb2-O1                               | 2.38(3)   |
| Ag3-S2                               | 2.356(13)  | Tb2-O4 <sup>4</sup>                  | 2.77(3)   |
| Tb1-O2 <sup>3</sup>                  | 2.45(2)    | Tb2-O4                               | 2.77(3)   |
| Tb1-O2                               | 2.45(2)    | Tb2-O4 <sup>3</sup>                  | 2.77(3)   |
| S1 <sup>1</sup> -Ag1-S1 <sup>2</sup> | 118.79(12) | O3 <sup>4</sup> -Tb1-O3 <sup>3</sup> | 118.2(3)  |
| S2 <sup>2</sup> -Ag2-S2 <sup>1</sup> | 119.92(3)  | O1-Tb2-O4 <sup>3</sup>               | 69.3(7)   |
| S2-Ag3-S1                            | 179.7(3)   | O1 <sup>3</sup> -Tb2-O4              | 139.9(10) |
| O2 <sup>3</sup> -Tb1-O2 <sup>4</sup> | 81.4(8)    | O1-Tb2-O1 <sup>3</sup>               | 98.8(11)  |
| O3-Tb1-O2 <sup>4</sup>               | 129.2(7)   | O1 <sup>4</sup> -Tb2-O4 <sup>4</sup> | 49.0(5)   |
| O3 <sup>4</sup> -Tb1-O2 <sup>4</sup> | 51.9(4)    | O4 <sup>4</sup> -Tb2-O4              | 117.2(3)  |
| O3 <sup>3</sup> -Tb1-O2              | 73.7(8)    |                                      |           |

Symmetry code: <sup>1</sup>+Z,+X,+Y; <sup>2</sup>+Y,+Z,+X; <sup>3</sup>1-Y,-1/2+Z,3/2-X; <sup>4</sup>3/2-Z,1-X,1/2+Y

**Table S10.** Selected bond distances (Å) and bond angles (°) of **3-D**.

|                                      |           |                                      |            |
|--------------------------------------|-----------|--------------------------------------|------------|
| Tb1-O1                               | 2.40(3)   | Tb2-O4 <sup>2</sup>                  | 1.79(4)    |
| Tb1-O1 <sup>1</sup>                  | 2.40(3)   | Tb2-O4                               | 1.79(4)    |
| Tb1-O1 <sup>2</sup>                  | 2.40(3)   | Ag1-S1 <sup>3</sup>                  | 2.487(9)   |
| Tb1-O2                               | 2.44(3)   | Ag1-S1                               | 2.487(9)   |
| Tb1-O2 <sup>1</sup>                  | 2.44(3)   | Ag1-S1 <sup>4</sup>                  | 2.487(9)   |
| Tb1-O2 <sup>2</sup>                  | 2.44(3)   | Ag2-S2 <sup>4</sup>                  | 2.476(10)  |
| Tb1-O4 <sup>1</sup>                  | 2.39(4)   | Ag2-S2 <sup>3</sup>                  | 2.476(10)  |
| Tb1-O4 <sup>2</sup>                  | 2.39(4)   | Ag2-S2                               | 2.476(10)  |
| Tb1-O4                               | 2.39(4)   | Ag3-S1                               | 2.408(12)  |
| Tb2-O4 <sup>1</sup>                  | 1.79(4)   | Ag3-S2                               | 2.381(12)  |
| O1-Tb1-O1 <sup>1</sup>               | 82.9(11)  | O4 <sup>1</sup> -Tb1-O2              | 63.0(11)   |
| O1 <sup>2</sup> -Tb1-O2 <sup>1</sup> | 73.5(9)   | O4-Tb1-O2 <sup>1</sup>               | 142.9(11)  |
| O1-Tb1-O2 <sup>1</sup>               | 130.2(10) | O4 <sup>2</sup> -Tb1-O2 <sup>2</sup> | 85.5(11)   |
| O1 <sup>1</sup> -Tb1-O2 <sup>1</sup> | 51.6(8)   | O4 <sup>1</sup> -Tb1-O4              | 80.8(14)   |
| O2 <sup>1</sup> -Tb1-O2 <sup>2</sup> | 118.2(3)  | O4 <sup>2</sup> -Tb2-O4 <sup>1</sup> | 119.8(2)   |
| O4 <sup>2</sup> -Tb1-O1              | 158.8(10) | S1 <sup>3</sup> -Ag1-S1              | 118.57(12) |
| O4-Tb1-O1                            | 86.7(11)  | S2 <sup>3</sup> -Ag2-S2 <sup>4</sup> | 119.78(5)  |
| O4-Tb1-O1 <sup>2</sup>               | 114.1(11) | S2-Ag3-S1                            | 178.9(4)   |

Symmetry code: <sup>1</sup>+Z,+X,+Y; <sup>2</sup>+Y,+Z,+X; <sup>3</sup>1/2-Y,1-Z,1/2+X; <sup>4</sup>-1/2+Z,1/2-X,1-Y
